# Supplementary material for: Halogenated tetraphenylethene with enhanced aggregation-induced emission: an anomalous anti-heavy-atom effect and self-reversible mechanochromism
Source: Royal Society of Chemistry journal article supplement (doi:10.1039/c9cc07045a), 2019-01-01
Supplement: c9cc07045a1.pdf [file c9cc07045a1.pdf]

## Electronic Supplementary Information *for*

# Halogenated Tetraphenylethene with Enhanced Aggregation-Induced Emission: Anomalous Anti-Heavy-Atom Effect and Self-Reversible Mechanochromism

Pengfei Xu,<sup>‡</sup> Qianqian Qiu,<sup>‡</sup> Xinru Ye, Mengru Wei, Weibin Xi, Hui Feng and Zhaosheng Qian\*

<sup>‡</sup>These authors contributed to this work equally.

\*Corresponding author. E-mail: qianzhaosheng@zjnu.cn.

Key Laboratory of the Ministry of Education for Advanced Catalysis Materials, College of Chemistry and Life Sciences, Zhejiang Normal University, Jinhua 321004, People's Republic of China

### Table of Contents

#### 1. Experimental Section

#### 2. Computational Details

#### 3. Supplementary Schemes and Figures

**3.1 Scheme S1.** (a) Synthesis routes of TPE, TFPE, TCPE and TBPE, and (b) synthesis route of TIPE.

**3.2 Figure S1.** Time-resolved fluorescence decay curves of TPE (a), TFPE (b), TCPE (c), TBPE (d) and TIPE (e) in solid state.

**3.3 Figure S2.** Aggregation-induced emission behaviors of TPE (a), TFPE (b), TCPE (c), TBPE (d) and TIPE (e) using water as the poor solvent.

**3.4 Figure S3.** Crystal structures and molecular packing with labeled distances between halogen-halogen atoms of TFPE (a), TCPE (b), TBPE (c) and TIPE (d).

**3.5 Figure S4.** PL spectra of TPE, TFPE, TCPE, TBPE and TIPE dispersed in SiO<sub>2</sub>.

**3.6 Figure S5.** Time-resolved fluorescence decay curves of TPE (a), TFPE (b), TCPE (c), TBPE (d) and TIPE (e) dispersed in SiO<sub>2</sub>.

**3.7 Figure S6.** PL spectra and fluorescent images of TFPE, TCPE, TBPE and TIPE in THF at 77 K.

**3.8 Figure S7.** Time-resolved fluorescence decay curves of TFPE (a), TCPE (b), TBPE (c) and TIPE (d) in THF at 77 K.

**3.9 Figure S8.** (a) PL spectra of pristine, ground and self-recovered TCPE solid within 8 min. Inset: photos of pristine crystals, ground crystals and self-recovered crystals of TCPE. (b) XRD patterns of pristine, grinding and self-recovered crystals of TCPE.

**3.10 Figure S9.** (a) PL spectra of pristine, ground and self-recovered TIPE solid within 8 min. Inset: photos of pristine crystals, ground crystals and annealed crystals of TIPE. (b)

XRD patterns of pristine, grinding and self-recovered crystals of TIPE.

#### **4. Supplementary Tables**

**4.1 Table S1.** Contribution ratios of different atoms to HOMOs and LUMOs of TPE, TFPE, TCPE, TBPE and TIPE

**4.2 Table S2.** Excitation energies of the first 20 states for TPE, TFPE, TCPE, TBPE and TIPE calculated with TDDFT at PBE0/6-31+G(d,p) level.

**4.3 Table S3.** Photophysical properties of TPE, TFPE, TCPE, TBPE and TIPE in different states.

**4.4 Table S4.** Crystallographic data for TFPE, TCPE, TBPE and TIPE.

#### **5. Spectra of Compounds**

#### **6. Cartesian Coordinates**

#### **7. References**

## 1. Experimental Section

**Synthesized of 1,1,2,2-Tetraphenylethene (TPE).** 1,1,2,2-Tetraphenylethylene was synthesized and purified according to the previous procedure in the literature.<sup>7</sup> <sup>1</sup>H NMR (600 MHz, CDCl<sub>3</sub>) δ (ppm) 7.10(m, J = 12 Hz, 12H), 7.03(m, J = 6 Hz, 8H). <sup>13</sup>C NMR (150 MHz, CDCl<sub>3</sub>) δ(ppm) 143.91, 141.12, 131.52, 127.83, 126.60. MS (ESI) m/z: [M<sup>+</sup>] 332.2 (calcd. for C<sub>26</sub>H<sub>20</sub>, 332.2).

**Synthesized of 1,1,2,2-Tetra(4-fluorophenyl)ethene (TFPE).** A certain amounts of Zn dust (1.84 g, 28 mmol) and TiCl<sub>4</sub> (1.58 mL, 14 mmol) were refluxed for 3 h in 100 mL of dry THF under N<sub>2</sub> atmosphere. A solution of 4,4'-Difluorobenzophenone (1.53 g, 7 mmol) in dry THF (30 mL) was added to the preceding suspension, and then the reaction was refluxed at 80 °C for 8 h. An aqueous solution containing 10% K<sub>2</sub>CO<sub>3</sub> (50 mL) was added after the reaction mixture was cooled down to room temperature. The resulting product was extracted with ethyl acetate. The solvent was evaporated under vacuum and the crude product was purified by a silica gel column using pure petroleum ether as the eluent. TFPE was obtained in 90% yield (1.37 g). <sup>1</sup>H NMR(600 MHz, CDCl<sub>3</sub>) δ (ppm) 6.94(d, J = 12 Hz, 8H), 6.81(d, J = 18 Hz, 8H). <sup>13</sup>C NMR (150 MHz, CDCl<sub>3</sub>) δ(ppm) 162.56, 160.92, 139.30, 133.01, 115.23. HRMS (ESI) m/z [M+Cl<sup>-</sup>] 439.0906 (calcd. for C<sub>26</sub>H<sub>16</sub>F<sub>4</sub>, 404.1188).

**Synthesis of 1,1,2,2-Tetra(4-chlorophenyl)ethene (TCPE).** The synthesis of TCPE followed the synthesis procedure of TFPE with replacing 4,4'-difluorobenzophenone with 4,4'-dichlorobenzophenone. The crude product was finally purified by column chromatography to give a white solid (Yield 86%). Molecular formula: C<sub>26</sub>H<sub>16</sub>Cl<sub>4</sub>. <sup>1</sup>H NMR(600 MHz, CDCl<sub>3</sub>) δ (ppm) 7.10(d, J = 12 Hz, 8H), 6.90(d, J = 12 Hz, 8H). <sup>13</sup>C NMR (150 MHz, CDCl<sub>3</sub>) δ(ppm) 141.12, 139.56, 132.99, 132.45, 128.33. HRMS (ESI) m/z [M+Cl<sup>-</sup>] 502.9719 (calcd. for C<sub>26</sub>H<sub>16</sub>Cl<sub>4</sub>, 468.0006).

**Synthesis of 1,1,2,2-Tetra(4-Bromophenyl)ethene (TBPE).** A similar procedure was applied to synthesis of TBPE using 4,4'-dibromobenzophenone as the initial reactant. A white powder in a yield of 80% was acquired after further purification using column

chromatography. Molecular formula:  $C_{26}H_{16}Br_4$ .  $^1H$  NMR(600 MHz,  $CDCl_3$ )  $\delta$  (ppm) 7.23(d,  $J = 6$  Hz, 8H), 6.82(d,  $J = 12$  Hz, 8H).  $^{13}C$  NMR (150 MHz,  $CDCl_3$ )  $\delta$ (ppm) 141.67, 139.83, 132.96, 131.53, 121.53. HRMS (ESI)  $m/z$ :  $[M+Cl^-]$  678.7687 (calcd. for  $C_{26}H_{16}Br_4$ , 643.7985).

**Synthesis of 1,1,2,2-Tetra(4-Iodophenyl)ethene (TIPE).** A given amount of tetraphenylethylene (1.028 g, 3.1 mmol) was first dissolved in 20 ml THF, and then 1.718 g of iodate (9.8 mmol), 1.914 g of iodine (7.5 mmol), 4 mL of water and 80 mL of acetic acid were added. The resulting mixture was stirred at 80 °C for 12 h. Then the mixture was cooled to room temperature and iced water was added. The product was extracted with dichloromethane, and washed with sodium thiosulfate. The dichloromethane solution was dried with anhydrous magnesium sulfate, and further concentrated to solid under vacuum. The obtained crude product was recrystallized by ethyl acetate and petroleum ether. Yield: 0.68 g (66%).  $^1H$  NMR(600 MHz,  $CDCl_3$ )  $\delta$  (ppm) 7.44(d,  $J = 6$  Hz, 8H), 6.69(d,  $J = 12$  Hz, 8H).  $^{13}C$  NMR (150 MHz,  $CDCl_3$ )  $\delta$ (ppm) 142.26, 140.00, 137.68, 133.16, 93.24.

**Characterization of Fluorescence Properties of All Samples.** Steady PL spectra of all samples were performed on an Edinburgh Instruments model FLS980 fluorescence spectrophotometer equipped with a xenon arc lamp using a front face sample holder. Time-resolved fluorescence measurements were conducted with EPL-series lasers. The fluorescence quantum yields of all samples were determined using an integrating sphere equipped in FLS980 spectrophotometer for at least three times.

## 2. Computational Details

All the calculations were performed with density functional theory (DFT) and time-dependent density functional theory (TDDFT) implemented in Gaussian 09 program package.<sup>1</sup> The ground state equilibrium geometries and the normal modes of vibration of the TPE derivatives were computed using density functional theory (DFT) with the hybrid B3LYP functional.<sup>2</sup> The basis set 6-31+G(d,p) level was used for C, H, F and Cl,

and the basis set LanL2DZ was used for Br and I. NBO calculations were performed at the same level, and the visualization of HOMOs and LUMOs were conducted with Gview program. Excited state calculations were run at PBE0 functional with time-dependent density functional theory (TD-DFT).<sup>3,4</sup> The basis set 6-31+G(d,p) level was used for C, H, F and Cl, and the basis set LanL2DZ was used for Br and I.

### 3. Supplementary Schemes and Figures

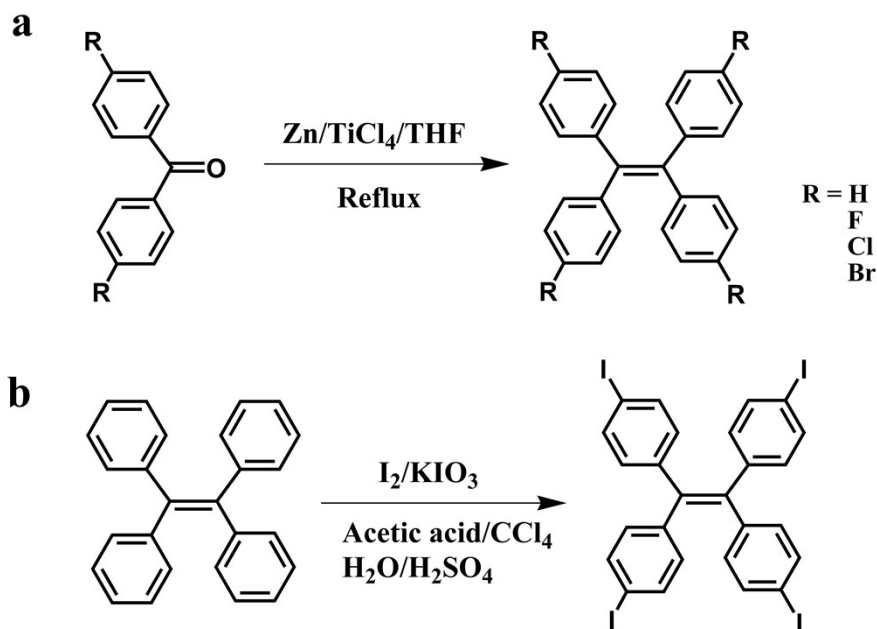

**Scheme S1.** (a) Synthesis routes of TPE, TFPE, TCPE and TBPE, and (b) synthesis route of TIPE.

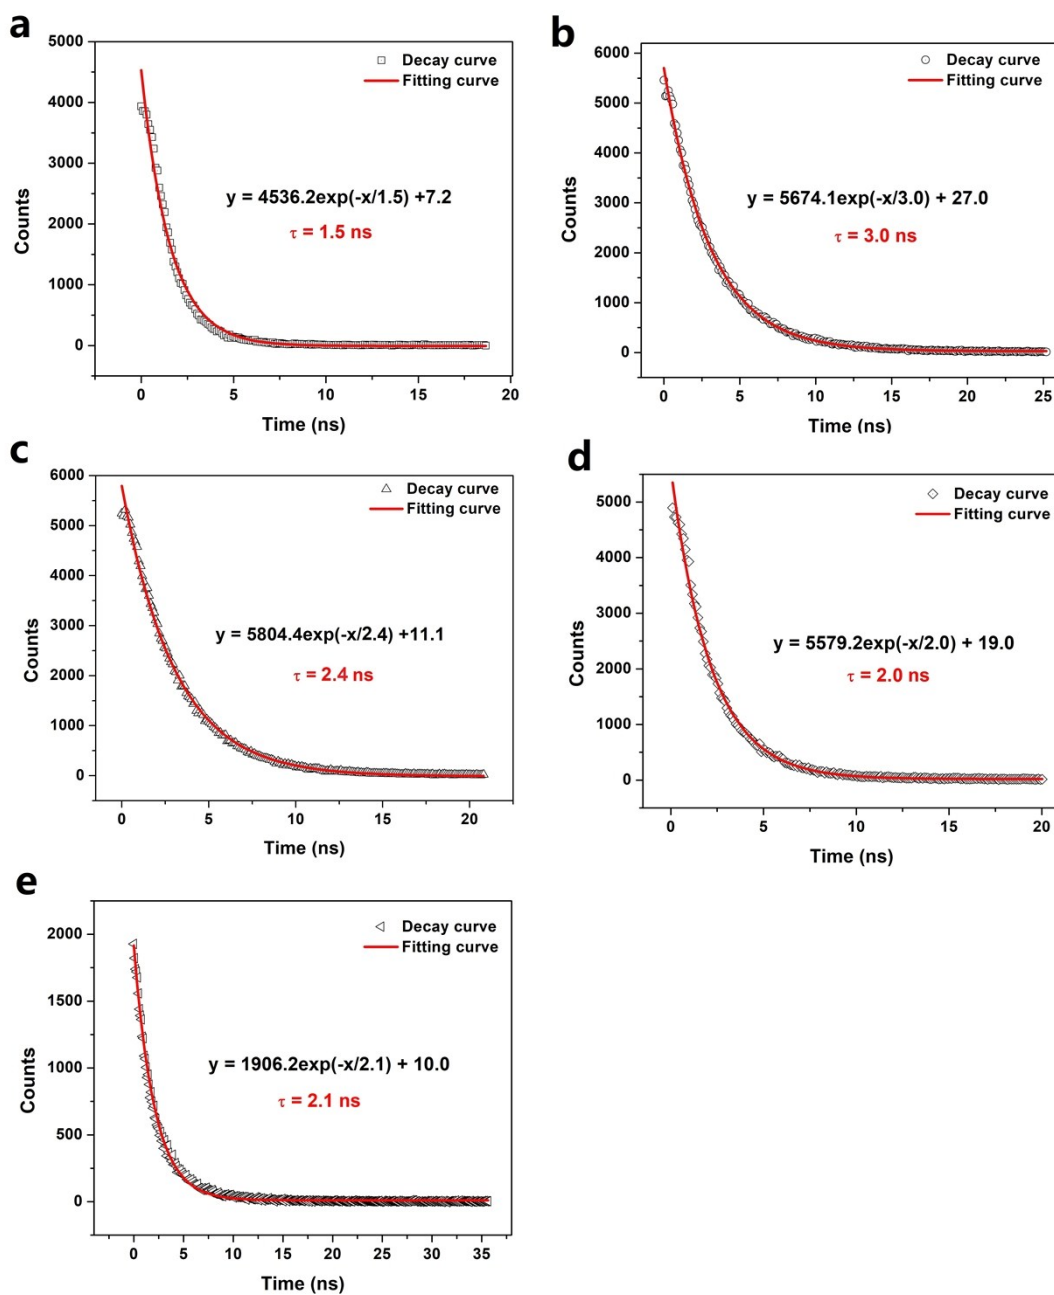

**Figure S1.** Time-resolved fluorescence decay curves of TPE (a), TFPE (b), TCPE (c), TBPE (d) and TIPE (e) in solid state.

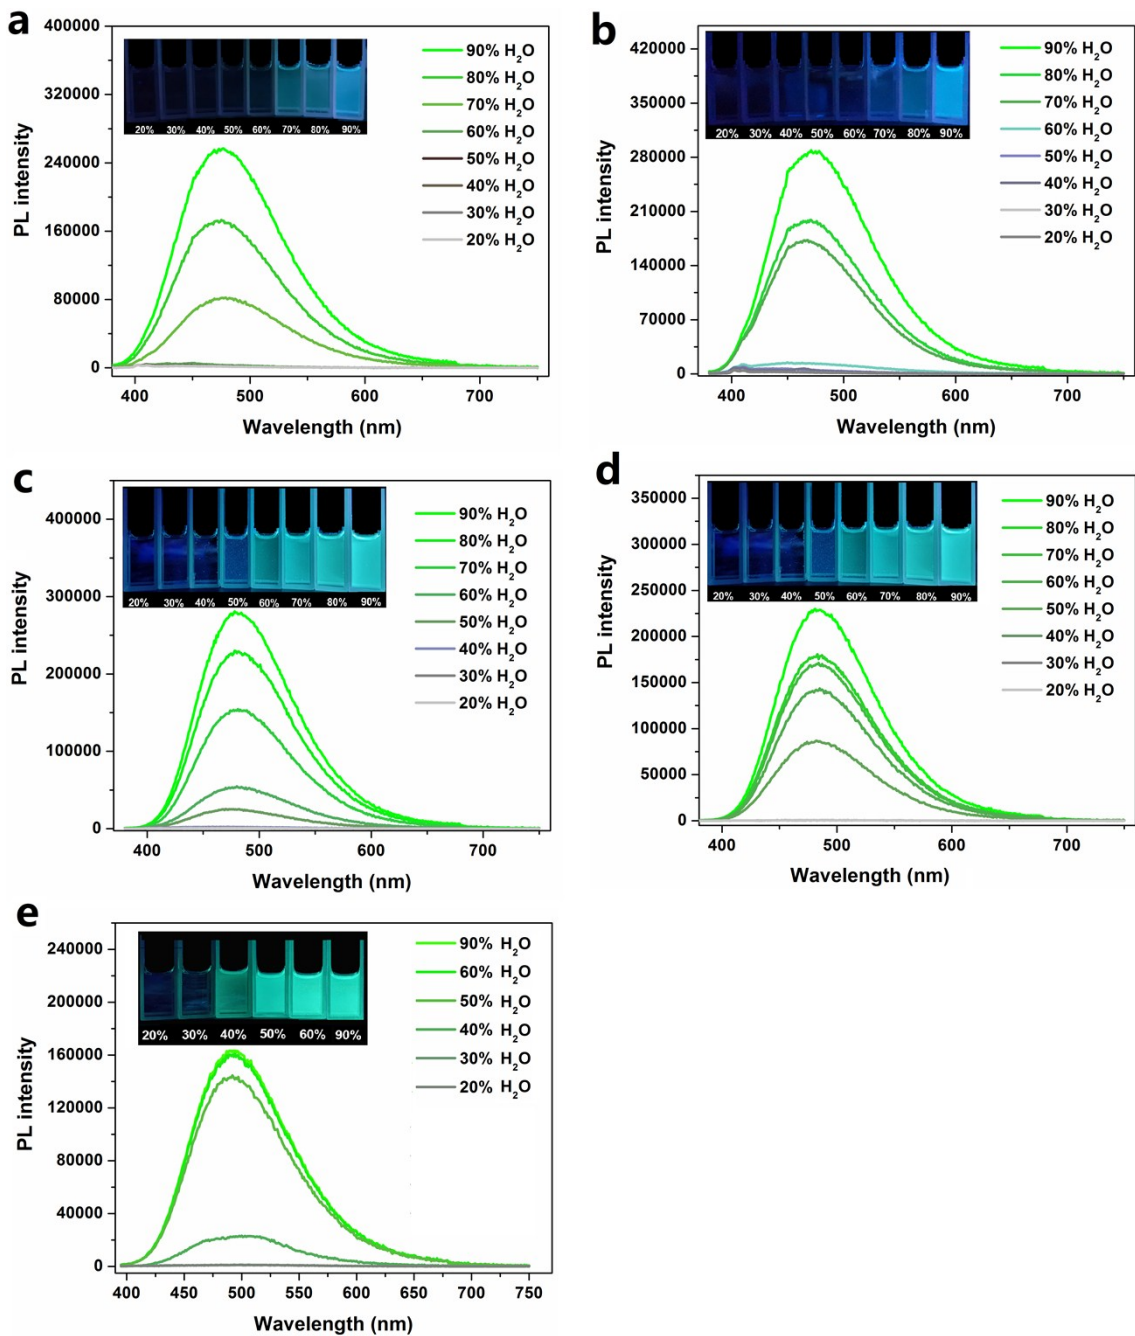

**Figure S2.** Aggregation-induced emission behaviors of TPE (a), TFPE (b), TCPE (c), TBPE (d) and TIPE (e) using water as the poor solvent.

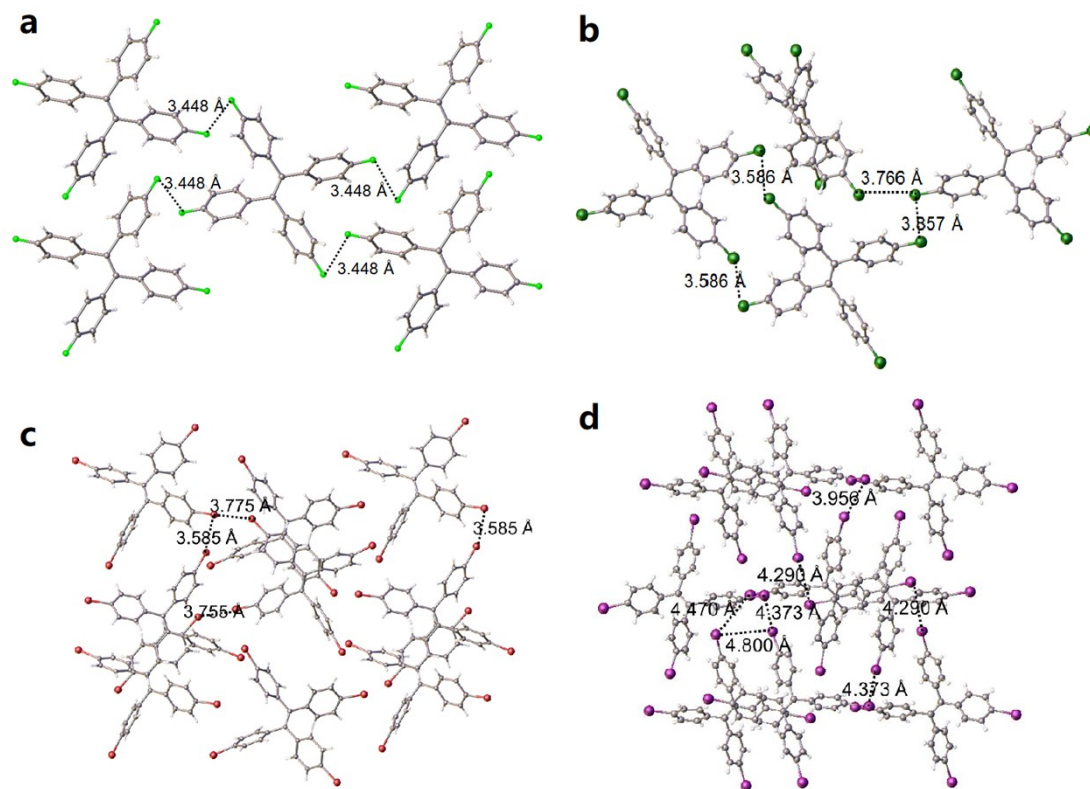

**Figure S3.** Crystal structures and molecular packing with labeled distances between halogen-halogen atoms of TFPE (a), TCPE (b), TBPE (c) and TIPE (d). Carbon, hydrogen, fluorine, chlorine, bromine and iodine atoms are represented in gray, white, green, olive, red and purple respectively.

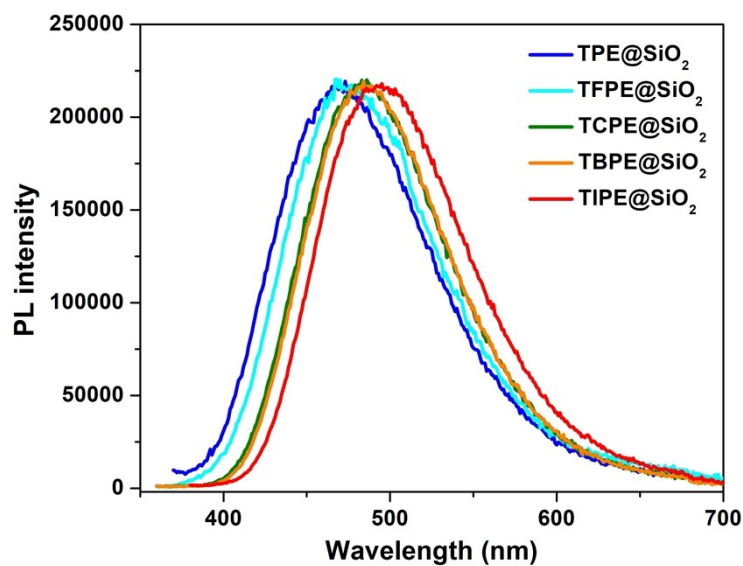

**Figure S4.** PL spectra of TPE, TFPE, TCPE, TBPE and TIPE dispersed in SiO<sub>2</sub>.



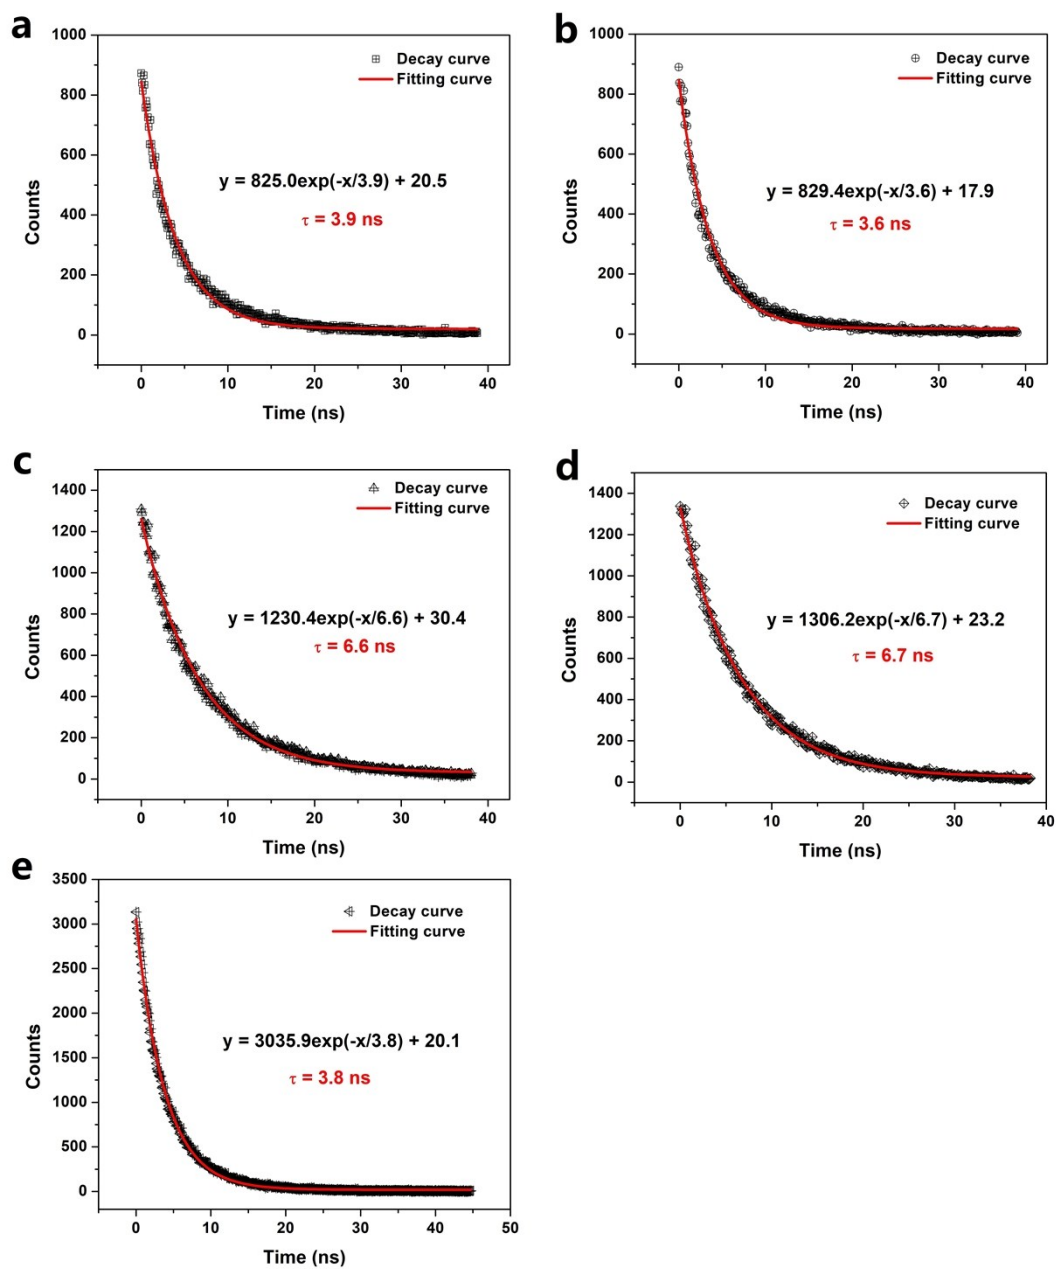

**Figure S5.** Time-resolved fluorescence decay curves of TPE (a), TFPE (b), TCPE (c), TBPE (d) and TIPE (e) dispersed in SiO<sub>2</sub>.

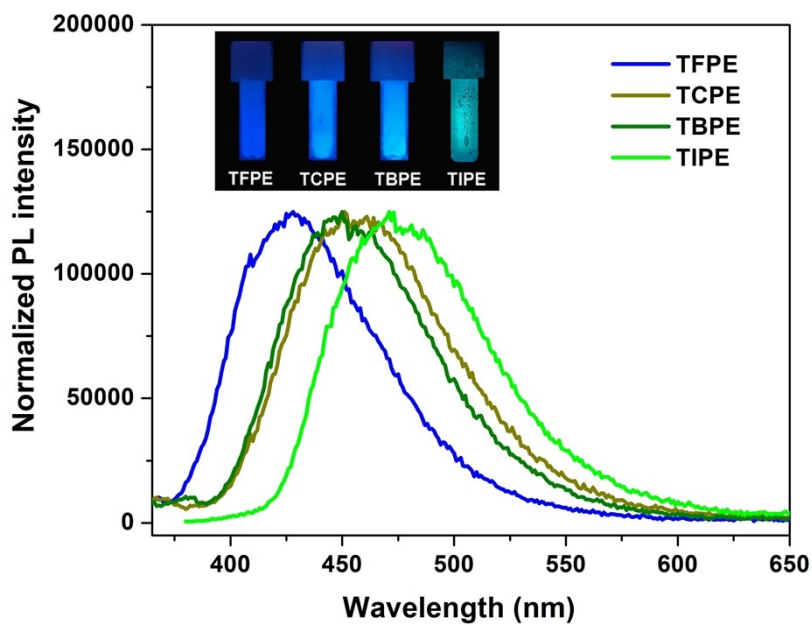

**Figure S6.** PL spectra and fluorescent images of TFPE, TCPE, TBPE and TIPE in THF at 77 K.

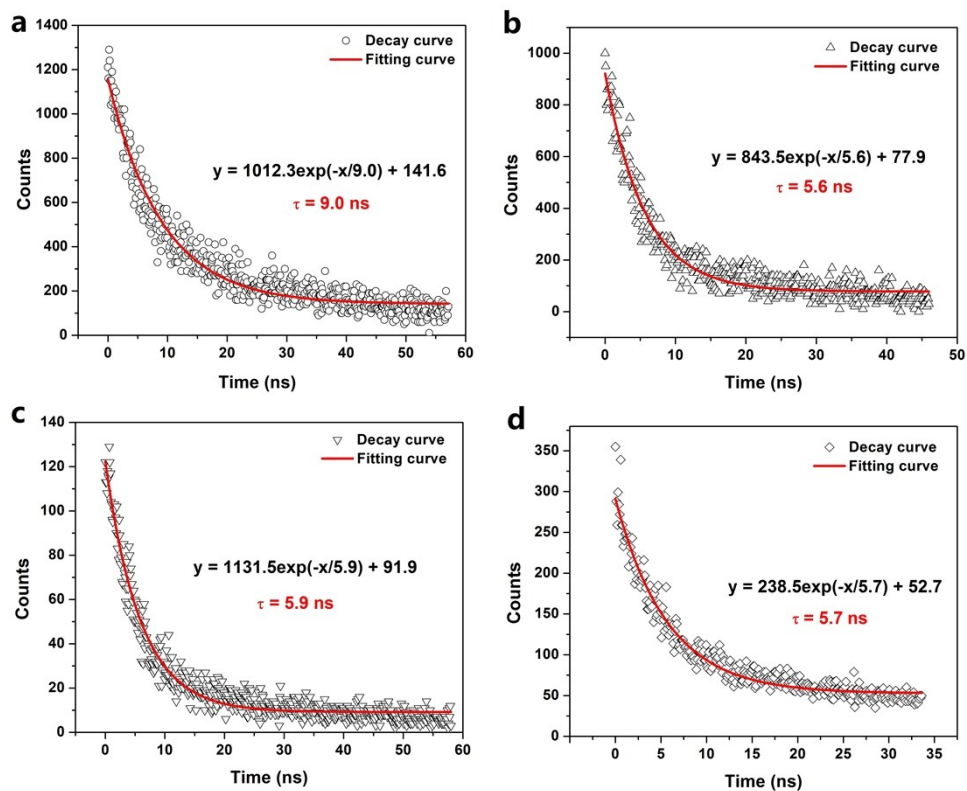

**Figure S7.** Time-resolved fluorescence decay curves of TFPE (a), TCPE (b), TBPE (c) and TIPE (d) in THF at 77 K.

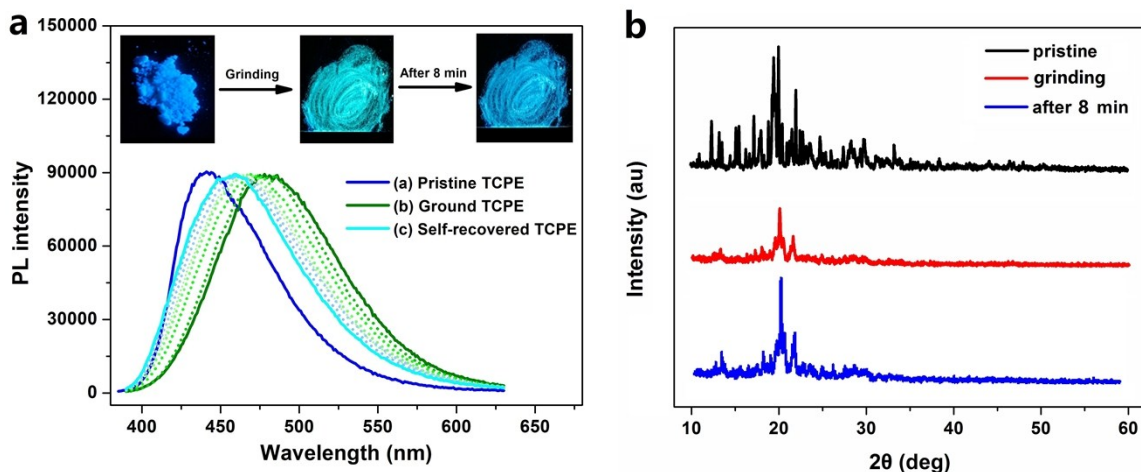

**Figure S8.** (a) PL spectra of pristine, ground and self-recovered TCPE solid within 8 min. Inset: photos of pristine crystals, ground crystals and self-recovered crystals of TCPE. (b) XRD patterns of pristine, grinding and self-recovered crystals of TCPE.

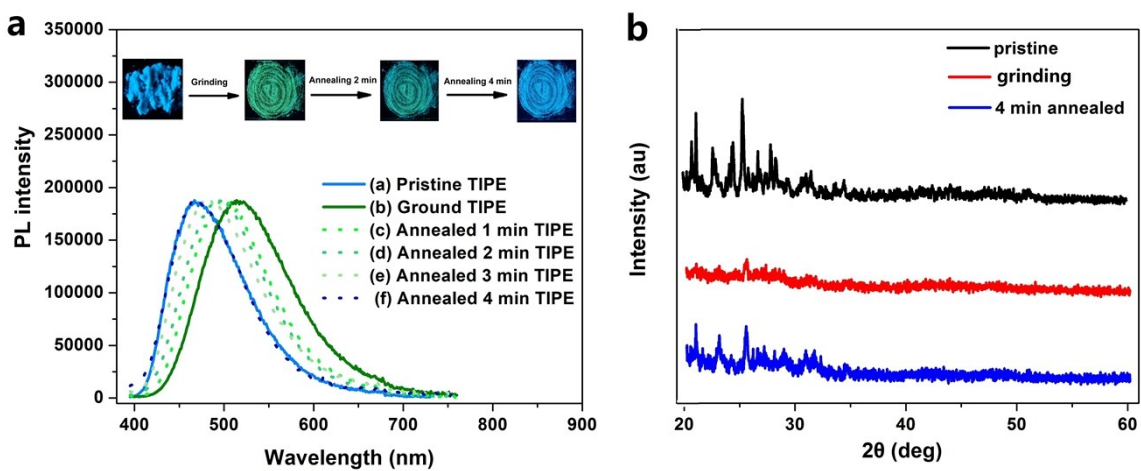

**Figure S9.** (a) PL spectra of pristine, ground and self-recovered TIPE solid within 8 min. Inset: photos of pristine crystals, ground crystals and annealed crystals of TIPE. (b) XRD patterns of pristine, grinding and self-recovered crystals of TIPE.

#### 4. Supplementary Tables

**Table S1. Contribution ratios of different atoms to HOMOs and LUMOs of TPE, TFPE, TCPE, TBPE and TIPE**

| Compound    | Center | Contribution to HOMO (%) | Contribution to LUMO (%) |
|-------------|--------|--------------------------|--------------------------|
| <b>TPE</b>  | C      | 98.86                    | 95.77                    |
|             | H      | 0.29                     | 0.20                     |
| <b>TFPE</b> | C      | 94.59                    | 94.40                    |
|             | H      | 0.15                     | 0.19                     |
|             | F      | 4.76                     | 2.11                     |
| <b>TCPE</b> | C      | 89.61                    | 93.72                    |
|             | H      | 0.14                     | 0.18                     |
|             | Cl     | 9.75                     | 2.51                     |
| <b>TBPE</b> | C      | 82.74                    | 84.98                    |
|             | H      | 4.82                     | 5.20                     |
|             | Br     | 12.07                    | 2.22                     |
| <b>TIPE</b> | C      | 82.16                    | 94.26                    |
|             | H      | 0.14                     | 0.21                     |
|             | I      | 17.30                    | 2.30                     |

**Table S2. Excitation energies of first 20 states for TPE, TFPE, TCPE, TBPE and TIPE calculated with TDDFT at PBE0/6-31+G(d,p) level.**

| State No | TPE                              | TFPE                             | TCPE                             | TBPE                             | TIPE                             |
|----------|----------------------------------|----------------------------------|----------------------------------|----------------------------------|----------------------------------|
| 1        | 2.3532 eV (T <sub>1</sub> )      | 2.3352 eV (T <sub>1</sub> )      | 2.2806 eV (T <sub>1</sub> )      | 2.2852 eV (T <sub>1</sub> )      | 2.2798 eV (T <sub>1</sub> )      |
| 2        | 3.3232 eV (T <sub>2</sub> )      | 3.3317 eV (T <sub>2</sub> )      | 3.2235 eV (T <sub>2</sub> )      | 3.2338 eV (T <sub>2</sub> )      | 3.2157 eV (T <sub>2</sub> )      |
| 3        | 3.3424 eV (T <sub>3</sub> )      | 3.3529 eV (T <sub>3</sub> )      | 3.2369 eV (T <sub>3</sub> )      | 3.2471 eV (T <sub>3</sub> )      | 3.2275 eV (T <sub>3</sub> )      |
| 4        | <b>3.4676 eV (T<sub>4</sub>)</b> | <b>3.4831 eV (T<sub>4</sub>)</b> | <b>3.3768 eV (T<sub>4</sub>)</b> | <b>3.3840 eV (T<sub>4</sub>)</b> | <b>3.3625 eV (T<sub>4</sub>)</b> |
| 5        | <b>3.7072 eV (S<sub>1</sub>)</b> | <b>3.6830 eV (S<sub>1</sub>)</b> | <b>3.5553 eV (S<sub>1</sub>)</b> | <b>3.5401 eV (S<sub>1</sub>)</b> | <b>3.5043 eV (S<sub>1</sub>)</b> |
| 6        | 3.8032 eV (T <sub>5</sub> )      | 3.8001 eV (T <sub>5</sub> )      | 3.7564 eV (T <sub>5</sub> )      | 3.7561 eV (T <sub>5</sub> )      | 3.7414 eV (T <sub>5</sub> )      |
| 7        | 4.0436 eV (T <sub>6</sub> )      | 3.8263 eV (T <sub>6</sub> )      | 3.8731 eV (T <sub>6</sub> )      | 3.8912 eV (T <sub>6</sub> )      | 3.8587 eV (T <sub>6</sub> )      |
| 8        | 4.1787 eV (T <sub>7</sub> )      | 3.9770 eV (T <sub>7</sub> )      | 4.0343 eV (T <sub>7</sub> )      | 4.0501 eV (T <sub>7</sub> )      | 3.9471 eV (T <sub>7</sub> )      |
| 9        | 4.2503 eV (T <sub>8</sub> )      | 4.1109 eV (T <sub>8</sub> )      | 4.1585 eV (T <sub>8</sub> )      | 4.1679 eV (T <sub>8</sub> )      | 3.9488 eV (T <sub>8</sub> )      |
| 10       | 4.2655 eV (T <sub>9</sub> )      | 4.1473 eV (S <sub>2</sub> )      | 4.1814 eV (S <sub>2</sub> )      | 4.1893 eV (S <sub>2</sub> )      | 3.9498 eV (T <sub>9</sub> )      |
| 11       | 4.3123 eV (T <sub>10</sub> )     | 4.1513 eV (T <sub>9</sub> )      | 4.1862 eV (T <sub>9</sub> )      | 4.1908 eV (T <sub>9</sub> )      | 3.9619 eV (T <sub>10</sub> )     |
| 12       | 4.3450 eV (S <sub>2</sub> )      | 4.3556 eV (S <sub>3</sub> )      | 4.2885 eV (T <sub>10</sub> )     | 4.2681 eV (T <sub>10</sub> )     | 4.0386 eV (T <sub>11</sub> )     |
| 13       | 4.3906 eV (T <sub>11</sub> )     | 4.3622 eV (T <sub>10</sub> )     | 4.2999 eV (S <sub>3</sub> )      | 4.2991 eV (S <sub>3</sub> )      | 4.1494 eV (S <sub>2</sub> )      |

|    |                             |                             |                             |                             |                             |
|----|-----------------------------|-----------------------------|-----------------------------|-----------------------------|-----------------------------|
| 14 | 4.4467 eV (S <sub>3</sub> ) | 4.3971 eV                   | 4.3415 eV                   | 4.3328 eV                   | 4.1494 eV                   |
|    |                             | (T <sub>11</sub> )          | (T <sub>11</sub> )          | (T <sub>11</sub> )          | (T <sub>12</sub> )          |
| 15 | 4.4721 eV                   | 4.4909 eV                   | 4.4154 eV                   | 4.3932 eV                   | 4.1741 eV                   |
|    | (T <sub>12</sub> )          | (T <sub>12</sub> )          | (T <sub>12</sub> )          | (T <sub>12</sub> )          | (T <sub>13</sub> )          |
| 16 | 4.4745 eV                   | 4.5388 eV                   | 4.4167 eV                   | 4.3963 eV                   | 4.2216 eV                   |
|    | (T <sub>13</sub> )          | (T <sub>13</sub> )          | (T <sub>13</sub> )          | (T <sub>13</sub> )          | (T <sub>14</sub> )          |
| 17 | 4.5107 eV                   | 4.6051 eV                   | 4.4313 eV                   | 4.4178 eV                   | 4.2607 eV (S <sub>3</sub> ) |
|    | (T <sub>14</sub> )          | (T <sub>14</sub> )          | (T <sub>14</sub> )          | (T <sub>14</sub> )          |                             |
| 18 | 4.5964 eV                   | 4.6433 eV (S <sub>4</sub> ) | 4.4887 eV (S <sub>4</sub> ) | 4.4449 eV (S <sub>4</sub> ) | 4.2966 eV                   |
|    | (T <sub>15</sub> )          |                             |                             |                             | (T <sub>15</sub> )          |
| 19 | 4.6342 eV                   | 4.6824 eV (S <sub>5</sub> ) | 4.5130 eV                   | 4.4598 eV                   | 4.3052 eV (S <sub>4</sub> ) |
|    | (T <sub>16</sub> )          |                             | (T <sub>15</sub> )          | (T <sub>15</sub> )          |                             |
| 20 | 4.6483 eV                   | 4.6957 eV (S <sub>6</sub> ) | 4.5633 eV                   | 4.5361 eV                   | 4.3329 eV                   |
|    | (T <sub>17</sub> )          |                             | (T <sub>16</sub> )          | (T <sub>16</sub> )          | (T <sub>16</sub> )          |

**Table S3.** Photophysical properties of TPE, TFPE, TCPE, TBPE and TIPE in different states

|                                     | $\lambda_{ab}$ (nm) | $\lambda_{em}$ (nm) | $\tau$ (ns) | $\Phi$ (%) | $k_r$ (10 <sup>8</sup> s <sup>-1</sup> ) | $k_{nr}$ (10 <sup>8</sup> s <sup>-1</sup> ) |
|-------------------------------------|---------------------|---------------------|-------------|------------|------------------------------------------|---------------------------------------------|
| <i>Crystal</i>                      |                     |                     |             |            |                                          |                                             |
| TPE                                 | -                   | 445                 | 1.5         | 32.6       | 2.2                                      | 4.5                                         |
| TFPE                                | -                   | 438                 | 3.0         | 58.6       | 2.0                                      | 1.3                                         |
| TCPE                                | -                   | 445                 | 2.4         | 75.5       | 3.1                                      | 1.1                                         |
| TBPE                                | -                   | 452                 | 2.0         | 64.4       | 3.2                                      | 1.8                                         |
| TIPE                                | -                   | 467                 | 2.1         | 49.3       | 2.3                                      | 2.5                                         |
| <i>Dispersed in SiO<sub>2</sub></i> |                     |                     |             |            |                                          |                                             |
| TPE                                 | -                   | 470                 | 3.9         | 22.2       | 0.57                                     | 2.0                                         |
| TFPE                                | -                   | 470                 | 3.6         | 5.2        | <b>0.14</b>                              | <b>2.6</b>                                  |
| TCPE                                | -                   | 480                 | 6.6         | 47.0       | <b>0.71</b>                              | <b>0.81</b>                                 |
| TBPE                                | -                   | 485                 | 6.7         | 54.3       | <b>0.81</b>                              | <b>0.69</b>                                 |
| TIPE                                | -                   | 493                 | 3.8         | 41.9       | <b>1.10</b>                              | <b>1.53</b>                                 |
| <i>In solution</i>                  |                     |                     |             |            |                                          |                                             |
| TPE                                 | 240 310             | 466                 | 6.7         | < 1        | -                                        | -                                           |
| TFPE                                | 231 304             | 460                 | 6.5         | < 1        | -                                        | -                                           |
| TCPE                                | 250 320             | 475                 | 6.1         | < 1        | -                                        | -                                           |
| TBPE                                | 253 323             | 510                 | 5.3         | < 1        | -                                        | -                                           |
| TIPE                                | 253 327             | 515                 | 4.0         | < 1        | -                                        | -                                           |

**Table S4.** Crystallographic data for TFPE, TCPE, TBPE and TIPE

| source                    | TFPE                                           | TCPE                                            | TBPE                                                                               | TIPE                                           |
|---------------------------|------------------------------------------------|-------------------------------------------------|------------------------------------------------------------------------------------|------------------------------------------------|
| CCDC No.                  | 1948854                                        | 1948855                                         | 1948856                                                                            | 1958228                                        |
| Chemical formula          | C <sub>26</sub> H <sub>16</sub> F <sub>4</sub> | C <sub>26</sub> H <sub>16</sub> Cl <sub>4</sub> | C <sub>26</sub> H <sub>16</sub> Br <sub>4</sub> 2(C <sub>4</sub> H <sub>8</sub> O) | C <sub>26</sub> H <sub>16</sub> I <sub>4</sub> |
| Formula weight            | 404.39                                         | 470.19                                          | 792.24                                                                             | 836.02                                         |
| Temperature (K)           | 289                                            | 298                                             | 293                                                                                | 273                                            |
| wavelength (Å)            | 0.71073                                        | 1.54178                                         | 0.71073                                                                            | 0.71073                                        |
| crystal system            | orthorhombic                                   | monoclinic                                      | orthorhombic                                                                       | orthorhombic                                   |
| space group               | Fdd2                                           | P 21/n                                          | P 21 21 21                                                                         | P 21 21 21                                     |
| a (Å)                     | 18.5763                                        | 20.1695                                         | 9.3392                                                                             | 9.6191                                         |
| b (Å)                     | 40.241                                         | 9.8843                                          | 15.1764                                                                            | 17.2316                                        |
| c (Å)                     | 5.6042                                         | 23.3874                                         | 21.938                                                                             | 18.9386                                        |
| $\alpha$                  | 90.00                                          | 90.00                                           | 90.00                                                                              | 90.00                                          |
| $\beta$                   | 90.00                                          | 92.701                                          | 90.00                                                                              | 90.00                                          |
| $\gamma$                  | 90.00                                          | 90.00                                           | 90.00                                                                              | 90.00                                          |
| volume (Å <sup>3</sup> )  | 4189.3                                         | 4657.4                                          | 3109.4                                                                             | 3139.1                                         |
| Z                         | 8                                              | 8                                               | 4                                                                                  | 4                                              |
| no. reflections collected | 7647                                           | 60267                                           | 37711                                                                              | 33612                                          |
| no. unique reflections    | 2344                                           | 8465                                            | 7120                                                                               | 8873                                           |
| $R_{int}$                 | 0.0224                                         | 0.0699                                          | 0.0964                                                                             | 0.0286                                         |
| no. parameters            | 136                                            | 541                                             | 361                                                                                | 308                                            |
| GOF on F <sup>2</sup>     | 1.057                                          | 1.051                                           | 1.017                                                                              | 1.050                                          |
| $R_I$                     | 0.0396                                         | 0.0708                                          | 0.0457                                                                             | 0.0427                                         |
| $wR2$                     | 0.1034                                         | 0.2078                                          | 0.0971                                                                             | 0.1383                                         |

## 5. Spectra of Compounds

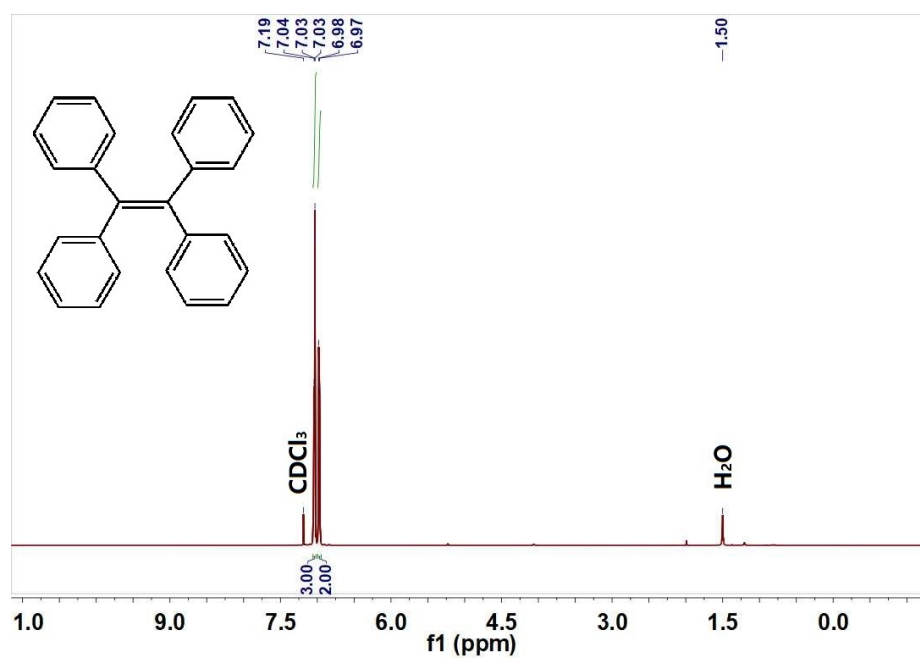

$^1\text{H}$  NMR spectrum of 1,1,2,2-tetraphenylethene (TPE) in  $\text{CDCl}_3$

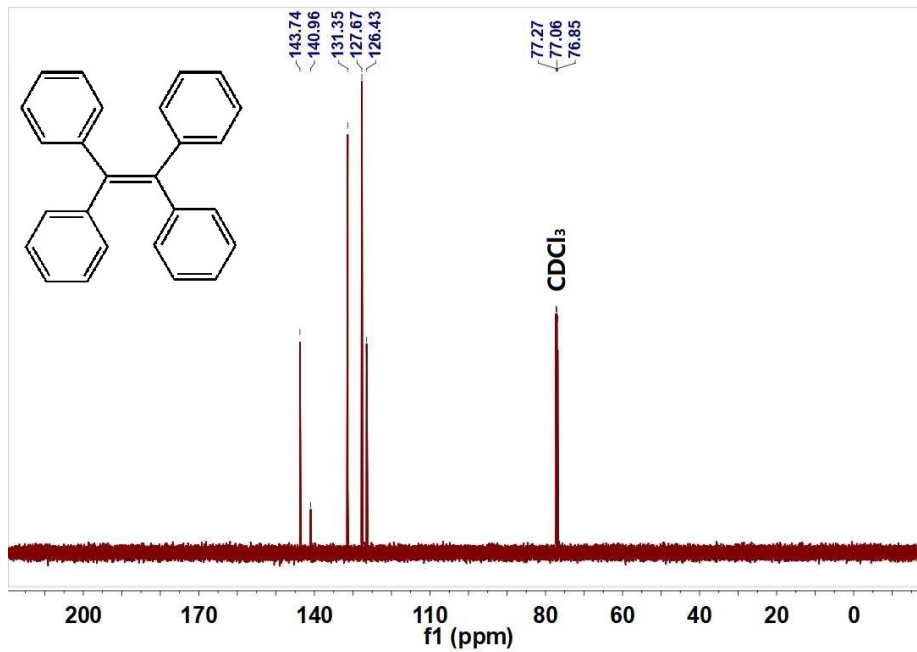

<sup>13</sup>C NMR spectrum of 1,1,2,2-tetraphenylethene (TPE) in CDCl<sub>3</sub>

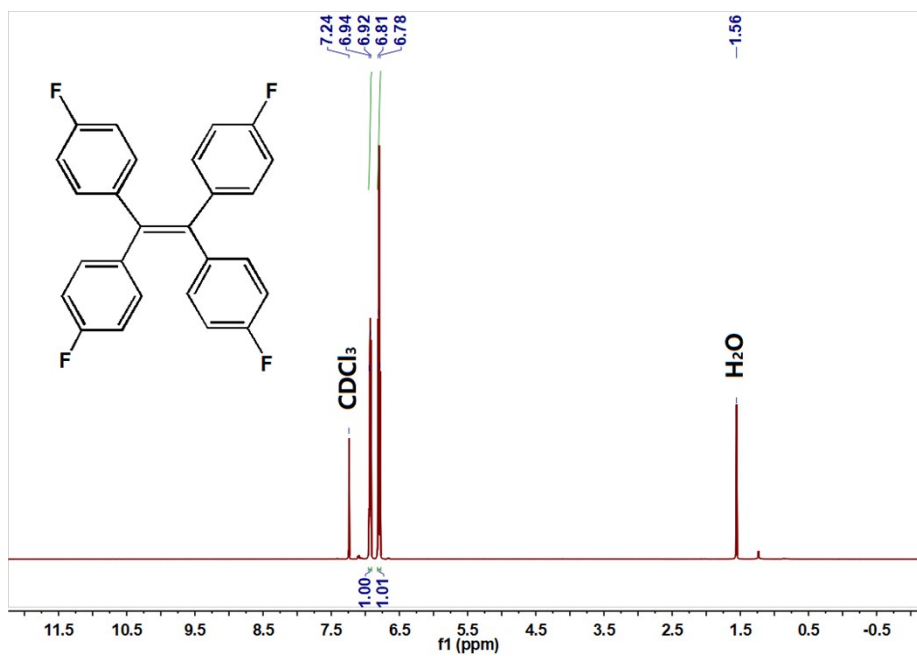

<sup>1</sup>H NMR spectrum of 1,1,2,2-tetra(4-fluorophenyl)ethylene (TFPE) in CDCl<sub>3</sub>



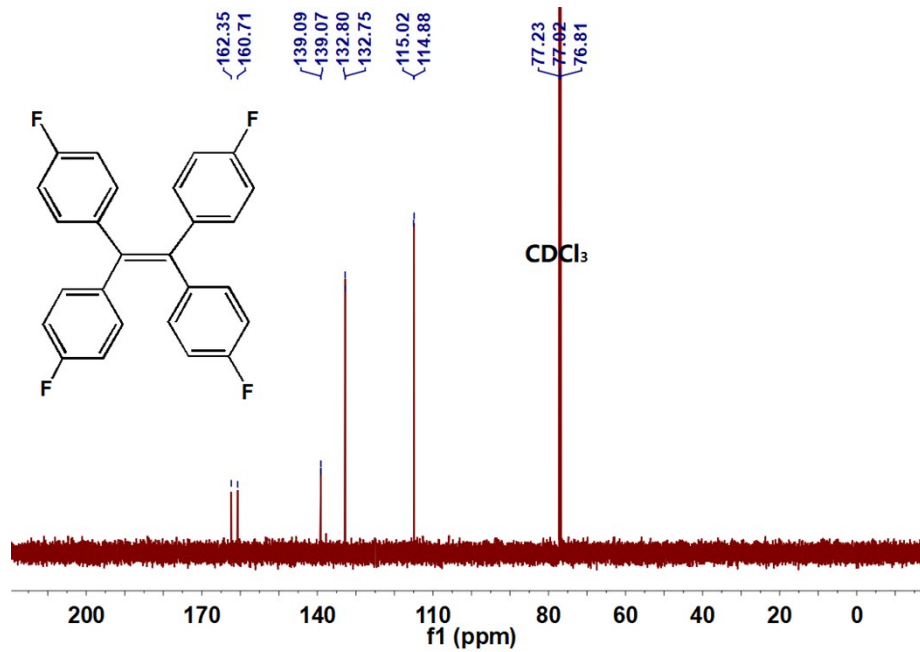

<sup>13</sup>C NMR spectrum of 1,1,2,2-tetra(4-fluorophenyl)ethylene (TFPE) in CDCl<sub>3</sub>

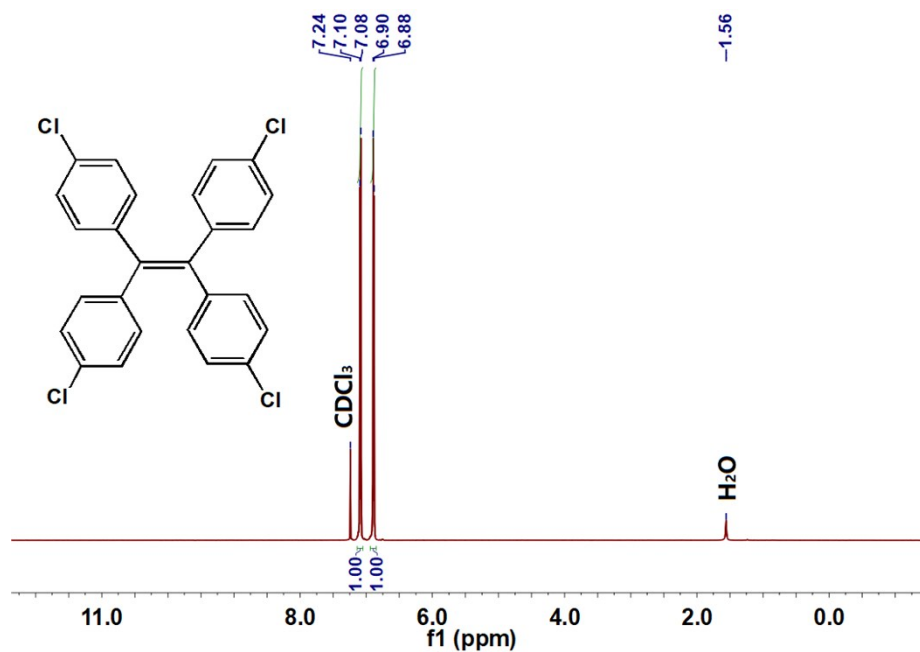

<sup>1</sup>H NMR spectrum of 1,1,2,2-tetra(4-chlorophenyl)ethylene (TCPE) in CDCl<sub>3</sub>

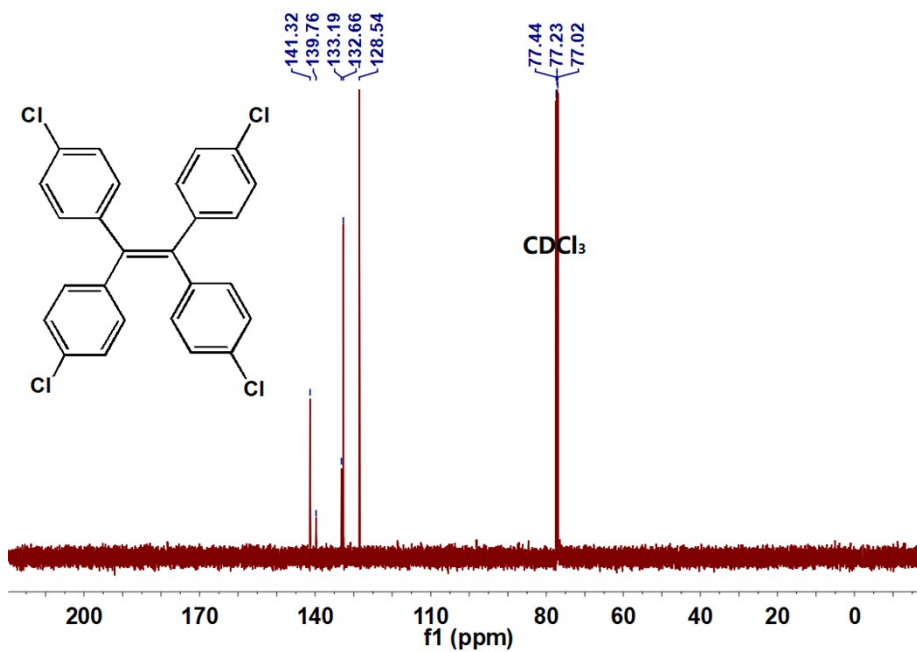

<sup>13</sup>C NMR spectrum of 1,1,2,2-tetra(4-chlorophenyl)ethylene (TCPE) in CDCl<sub>3</sub>

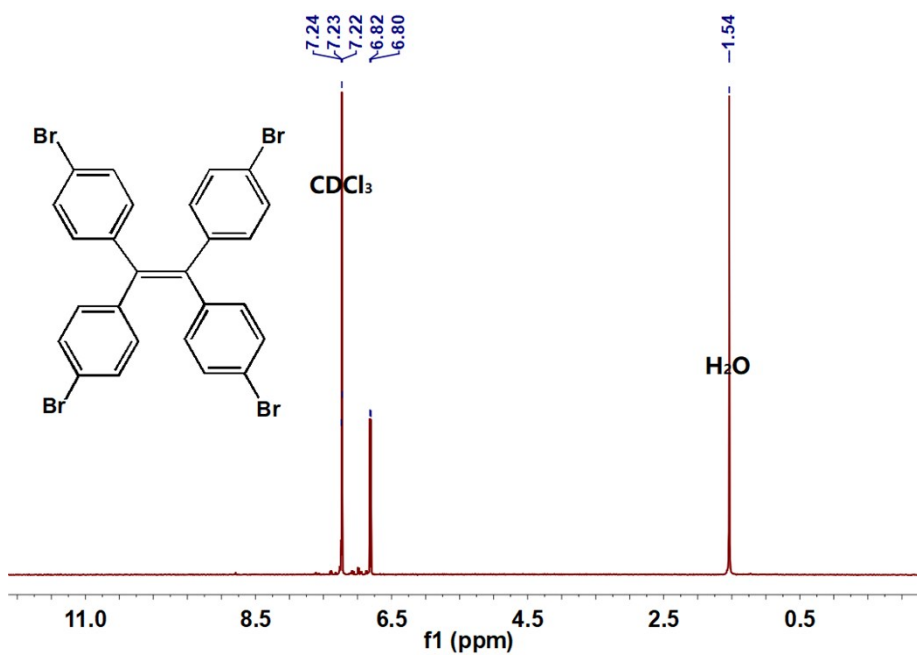

<sup>1</sup>H NMR spectrum of 1,1,2,2-tetra(4-bromophenyl)ethylene (TBPE) in CDCl<sub>3</sub>

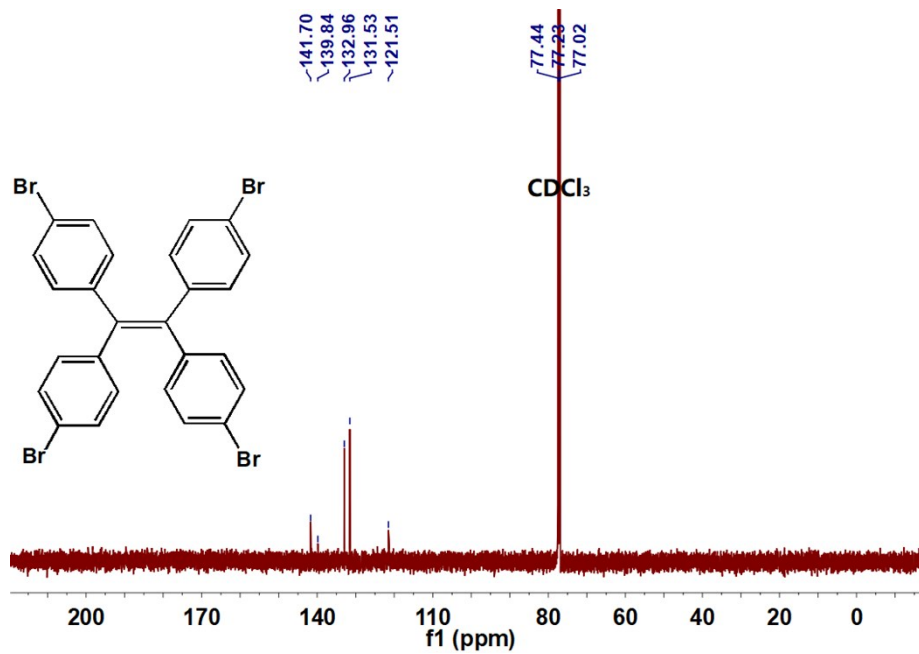

<sup>13</sup>C NMR spectrum of 1,1,2,2-tetra(4-bromophenyl)ethylene (TBPE) in CDCl<sub>3</sub>

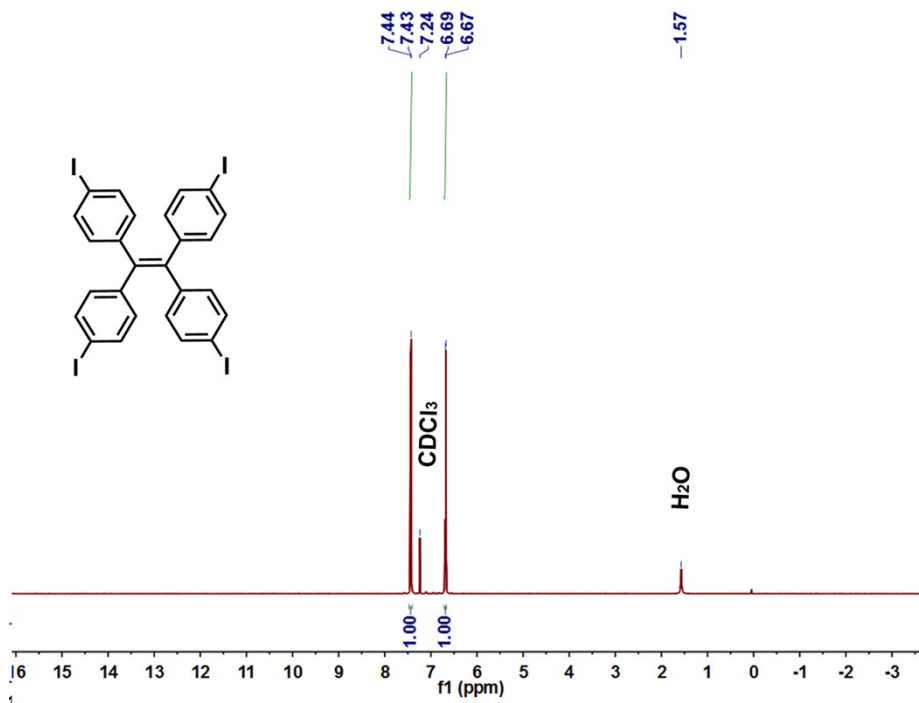

<sup>1</sup>H NMR spectrum of 1,1,2,2-tetra(4-iodophenyl)ethylene (TIPE) in CDCl<sub>3</sub>

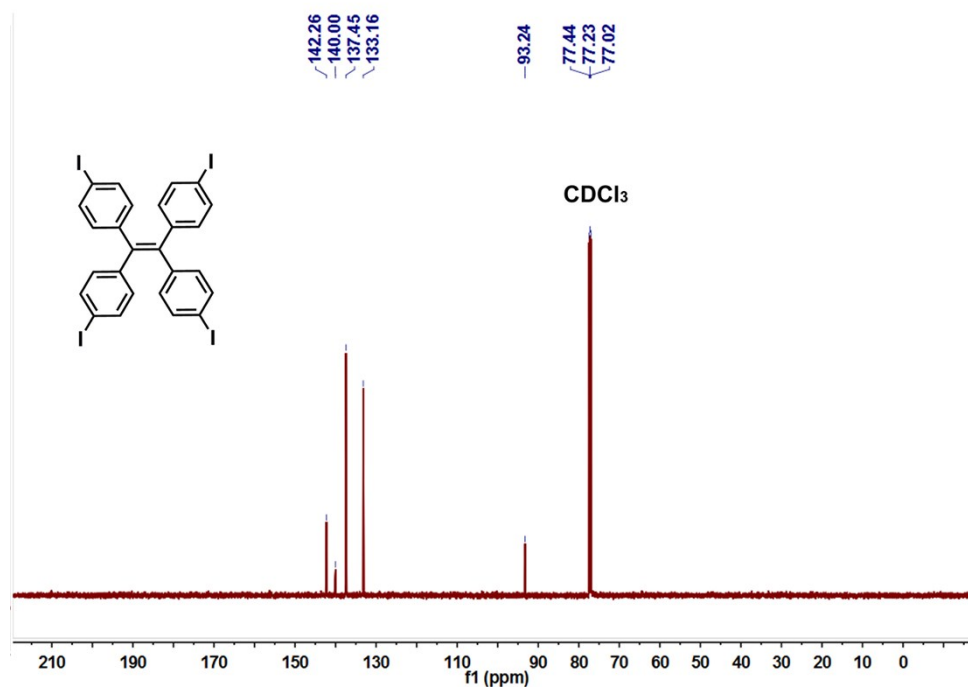

$^{13}\text{C}$  NMR spectrum of 1,1,2,2-tetra(4-iodophenyl)ethylene (TIPE) in  $\text{CDCl}_3$

## 6. Cartesian Coordinates

### TPE

|   |             |             |             |
|---|-------------|-------------|-------------|
| C | 5.61546800  | 12.44776300 | 14.27613600 |
| C | 6.39406700  | 12.73758800 | 13.03157700 |
| C | 5.12501800  | 12.81464100 | 16.71282500 |
| C | 6.68423700  | 11.71092900 | 12.11463500 |
| H | 6.35301500  | 10.69841600 | 12.32678300 |
| C | 7.37670900  | 13.43820700 | 15.77011800 |
| C | 3.48049800  | 12.75589900 | 19.00689700 |
| C | 6.01533300  | 12.87387700 | 15.51172200 |
| C | 3.00716900  | 13.30964600 | 17.81413600 |
| H | 2.00368200  | 13.72309500 | 17.76531500 |
| C | 9.80502700  | 13.28717900 | 15.61559300 |
| H | 10.68751700 | 12.75099000 | 15.27793600 |
| C | 7.39571300  | 11.97432200 | 10.94333000 |
| H | 7.62014200  | 11.16300800 | 10.25641800 |
| C | 4.36513200  | 11.65500900 | 14.06030500 |
| C | 7.52873400  | 14.63054800 | 16.50099800 |
| H | 6.64544300  | 15.15054100 | 16.86034200 |

|   |             |             |             |
|---|-------------|-------------|-------------|
| C | 8.53761700  | 12.77061600 | 15.34202700 |
| H | 8.44268900  | 11.83918000 | 14.79325000 |
| C | 6.81004700  | 14.04339800 | 12.71856400 |
| H | 6.58084500  | 14.85263700 | 13.40451800 |
| C | 5.59562700  | 12.28116300 | 17.92642100 |
| H | 6.60823900  | 11.89167500 | 17.97945500 |
| C | 4.77948800  | 12.24119100 | 19.05778500 |
| H | 5.16030700  | 11.81285200 | 19.98080700 |
| C | 3.82045100  | 13.33732300 | 16.68009500 |
| H | 3.44473900  | 13.76953600 | 15.75816900 |
| C | 4.08581600  | 10.50754900 | 14.82300900 |
| H | 4.77994400  | 10.20468800 | 15.60047400 |
| C | 3.46105700  | 12.01166400 | 13.04320000 |
| H | 3.66897600  | 12.88201800 | 12.42751600 |
| C | 9.93979100  | 14.48551900 | 16.32218200 |
| C | 8.79484400  | 15.15520200 | 16.76434100 |
| H | 8.88714100  | 16.08431000 | 17.31993700 |
| C | 2.93309900  | 9.75520500  | 14.59180900 |
| H | 2.74087200  | 8.86989400  | 15.19148100 |
| C | 7.81213200  | 13.27660100 | 10.65082600 |
| C | 2.03187000  | 10.13550200 | 13.59346200 |
| C | 2.30155100  | 11.26811500 | 12.81932900 |
| H | 1.61118200  | 11.57068000 | 12.03684500 |
| C | 7.50983300  | 14.31092500 | 11.54088000 |
| H | 7.81761600  | 15.32887100 | 11.31868800 |
| H | 8.35969500  | 13.48385500 | 9.73590800  |
| H | 1.13330900  | 9.55171100  | 13.41563300 |
| H | 2.84714200  | 12.73209600 | 19.88902800 |
| H | 10.92595700 | 14.88922500 | 16.53284100 |

**TFPE**

|   |            |             |             |
|---|------------|-------------|-------------|
| C | 5.61602100 | 12.44663400 | 14.27540300 |
| C | 6.39079200 | 12.74372500 | 13.03097000 |
| C | 5.12260800 | 12.82051400 | 16.70970100 |
| C | 6.67881300 | 11.72396700 | 12.10531900 |
| H | 6.34913700 | 10.70944400 | 12.30792400 |
| C | 7.37950900 | 13.43076900 | 15.77036400 |
| C | 3.48768300 | 12.77233600 | 18.97001600 |
| C | 6.01619900 | 12.87311700 | 15.51148400 |
| C | 2.99282900 | 13.32516200 | 17.79546400 |
| H | 1.98775100 | 13.73222100 | 17.76996200 |

|   |             |             |             |
|---|-------------|-------------|-------------|
| C | 9.81160000  | 13.26469100 | 15.60451900 |
| H | 10.70718700 | 12.74819100 | 15.27637200 |
| C | 7.38773100  | 11.98553500 | 10.93233600 |
| H | 7.62262300  | 11.20009800 | 10.22202100 |
| C | 4.36970400  | 11.64802400 | 14.06234800 |
| C | 7.53878600  | 14.61945900 | 16.50608600 |
| H | 6.66067300  | 15.14376600 | 16.87055200 |
| C | 8.53800300  | 12.76140600 | 15.33703900 |
| H | 8.44203300  | 11.83189200 | 14.78598800 |
| C | 6.80795800  | 14.05138100 | 12.72536700 |
| H | 6.58071600  | 14.85823400 | 13.41412200 |
| C | 5.58710200  | 12.29237600 | 17.92824100 |
| H | 6.59817100  | 11.90136800 | 17.99033800 |
| C | 4.77362300  | 12.25339000 | 19.06125200 |
| H | 5.12383100  | 11.83638800 | 19.99938900 |
| C | 3.81801800  | 13.34377500 | 16.67037300 |
| H | 3.44412600  | 13.77432500 | 15.74740500 |
| C | 4.09273800  | 10.50404300 | 14.83196300 |
| H | 4.78611400  | 10.20479200 | 15.61091300 |
| C | 3.46406700  | 11.99436800 | 13.04274500 |
| H | 3.66598500  | 12.86088000 | 12.42043200 |
| C | 9.91756200  | 14.45465500 | 16.31373500 |
| C | 8.80305100  | 15.14579200 | 16.77349300 |
| H | 8.92952700  | 16.06801000 | 17.33037700 |
| C | 2.94500200  | 9.74119400  | 14.61325300 |
| H | 2.73085700  | 8.85548800  | 15.20166900 |
| C | 7.78953000  | 13.29174800 | 10.68001200 |
| C | 2.06811700  | 10.13674400 | 13.61085400 |
| C | 2.30469900  | 11.25192300 | 12.81608100 |
| H | 1.59787200  | 11.52297800 | 12.03921300 |
| C | 7.50699000  | 14.33594900 | 11.55175800 |
| H | 7.82618500  | 15.34414600 | 11.31058400 |
| F | 8.47290700  | 13.55843100 | 9.53527300  |
| F | 0.94557400  | 9.40144000  | 13.39247400 |
| F | 2.69041700  | 12.74752300 | 20.07104800 |
| F | 11.15422900 | 14.95438000 | 16.57724500 |

**TCPE**

|    |             |             |             |
|----|-------------|-------------|-------------|
| Cl | 11.52666200 | 15.12356000 | 16.65102300 |
| Cl | 2.45068200  | 12.72619400 | 20.40996000 |
| Cl | 0.59462900  | 9.18965200  | 13.32397300 |

|    |             |             |             |
|----|-------------|-------------|-------------|
| CI | 8.68947300  | 13.62896700 | 9.18797700  |
| C  | 5.61637100  | 12.44591400 | 14.27563800 |
| C  | 6.39214300  | 12.74073600 | 13.03213300 |
| C  | 5.12396600  | 12.81779900 | 16.70998500 |
| C  | 6.67670800  | 11.72168000 | 12.10569700 |
| H  | 6.34451300  | 10.70729500 | 12.30556300 |
| C  | 7.37812300  | 13.43236700 | 15.77024900 |
| C  | 3.48048600  | 12.76346600 | 18.98631000 |
| C  | 6.01642600  | 12.87242400 | 15.51191200 |
| C  | 2.99591500  | 13.31463300 | 17.79984100 |
| H  | 1.99204200  | 13.72299500 | 17.75820500 |
| C  | 9.80950600  | 13.27674200 | 15.60300600 |
| H  | 10.69616700 | 12.75084800 | 15.26606200 |
| C  | 7.38715200  | 11.98211700 | 10.93415700 |
| H  | 7.61164200  | 11.18404900 | 10.23482000 |
| C  | 4.36913100  | 11.65019500 | 14.06216800 |
| C  | 7.53603200  | 14.62010900 | 16.50643400 |
| H  | 6.65839200  | 15.14384300 | 16.87324900 |
| C  | 8.53846500  | 12.76842800 | 15.33608500 |
| H  | 8.44788300  | 11.83847500 | 14.78459500 |
| C  | 6.81527800  | 14.04547700 | 12.72585300 |
| H  | 6.59229500  | 14.85532900 | 13.41267100 |
| C  | 5.58948800  | 12.29145500 | 17.92807500 |
| H  | 6.60125600  | 11.90218500 | 17.99201300 |
| C  | 4.77600700  | 12.24993900 | 19.06016000 |
| H  | 5.14356400  | 11.82908400 | 19.98974100 |
| C  | 3.81834200  | 13.33658200 | 16.67356800 |
| H  | 3.43969000  | 13.76741000 | 15.75251100 |
| C  | 4.08666300  | 10.50826400 | 14.83135500 |
| H  | 4.77657200  | 10.20508500 | 15.61204700 |
| C  | 3.46543100  | 11.99652200 | 13.04182800 |
| H  | 3.66774900  | 12.86173100 | 12.41760500 |
| C  | 9.92992400  | 14.47097200 | 16.31415800 |
| C  | 8.79902100  | 15.14910600 | 16.77092000 |
| H  | 8.90549900  | 16.07314700 | 17.32868100 |
| C  | 2.93715300  | 9.74980100  | 14.61067800 |
| H  | 2.73468800  | 8.86811300  | 15.20893100 |
| C  | 7.80294600  | 13.28712500 | 10.66655800 |
| C  | 2.04879300  | 10.13536900 | 13.60640800 |
| C  | 2.30495300  | 11.25678500 | 12.81625800 |
| H  | 1.60979200  | 11.54351000 | 12.03469700 |

|   |            |             |             |
|---|------------|-------------|-------------|
| C | 7.51526300 | 14.32567500 | 11.55253300 |
| H | 7.83168200 | 15.33819700 | 11.32701800 |

### TBPE

|    |             |             |             |
|----|-------------|-------------|-------------|
| Br | 11.69642600 | 4.56867500  | 4.99187400  |
| Br | 2.33006700  | 7.04949300  | 8.87961800  |
| Br | 0.41425800  | 10.66248900 | 1.60203000  |
| Br | 8.78486300  | 6.09392600  | -2.66010200 |
| C  | 3.45864800  | 7.76310500  | 1.35089000  |
| H  | 3.66446100  | 6.89866900  | 0.72634800  |
| C  | 9.80390500  | 6.49073100  | 3.90922900  |
| H  | 10.68794100 | 7.01700900  | 3.56647200  |
| C  | 7.52900400  | 5.15255800  | 4.82250300  |
| H  | 6.65150400  | 4.63077700  | 5.19307000  |
| C  | 6.66758700  | 8.04343400  | 0.41567700  |
| H  | 6.33281000  | 9.05777200  | 0.61269000  |
| C  | 6.00989000  | 6.89756500  | 3.82408900  |
| C  | 4.76894000  | 7.52350300  | 7.37249500  |
| H  | 5.13960300  | 7.94639000  | 8.29974100  |
| C  | 5.11729400  | 6.95305000  | 5.02223200  |
| C  | 5.58303200  | 7.48141300  | 6.23923800  |
| H  | 6.59459100  | 7.87186600  | 6.30302600  |
| C  | 8.53151700  | 7.00031400  | 3.64424600  |
| H  | 8.44119200  | 7.92929900  | 3.09063800  |
| C  | 6.38568800  | 7.02547900  | 1.34399600  |
| C  | 8.79293500  | 4.62167200  | 5.08563300  |
| H  | 8.89553600  | 3.69893500  | 5.64595200  |
| C  | 7.37973400  | 7.78185300  | -0.75621600 |
| H  | 7.60043900  | 8.58123900  | -1.45505600 |
| C  | 2.03845600  | 9.61625100  | 1.91649300  |
| C  | 9.91847500  | 5.29950100  | 4.62208300  |
| C  | 2.98864500  | 6.45505300  | 6.11234200  |
| H  | 1.98576300  | 6.04506000  | 6.06691300  |
| C  | 4.07337800  | 9.25381800  | 3.14179700  |
| H  | 4.76179200  | 9.55991400  | 3.92299300  |
| C  | 7.79589400  | 6.47754000  | -1.01494000 |
| C  | 2.92010600  | 10.00889000 | 2.92088200  |
| H  | 2.71731200  | 10.88862100 | 3.52163000  |
| C  | 6.81173400  | 5.72072500  | 1.04204000  |
| H  | 6.59039600  | 4.91172600  | 1.73075000  |
| C  | 3.81233300  | 6.43276700  | 4.98538300  |



|   |            |            |             |
|---|------------|------------|-------------|
| H | 3.43391600 | 6.00022600 | 4.06476000  |
| C | 2.29422100 | 8.49886200 | 1.12442300  |
| H | 1.60306100 | 8.20661700 | 0.34156000  |
| C | 7.51372600 | 5.43860300 | -0.13109300 |
| H | 7.83153000 | 4.42526300 | -0.35011100 |
| C | 4.35983300 | 8.11334900 | 2.37200100  |
| C | 3.47687900 | 7.00797600 | 7.29389200  |
| C | 7.37187500 | 6.33828200 | 4.08307200  |
| C | 5.60921200 | 7.32124100 | 2.58701800  |

**TIPE**

|   |             |             |             |
|---|-------------|-------------|-------------|
| C | -1.50068300 | 2.56078200  | -0.73366800 |
| H | -0.78729900 | 2.79456600  | -1.51879800 |
| C | 3.35213000  | -2.00522600 | 1.28046400  |
| H | 4.06193000  | -1.78264100 | 2.06975600  |
| C | 1.49590600  | -2.58080000 | -0.72163100 |
| H | 0.77461000  | -2.82241900 | -1.49702100 |
| C | 1.50857700  | 2.56336300  | 0.74502700  |
| H | 0.79574400  | 2.79773900  | 1.53048100  |
| C | 0.00324100  | -0.68683000 | 0.00931000  |
| C | -2.67239700 | -3.32812000 | 0.63289400  |
| H | -2.85766900 | -4.13844600 | 1.32947500  |
| C | -1.25110600 | -1.48970100 | -0.12216500 |
| C | -1.51347800 | -2.55879100 | 0.75212600  |
| H | -0.80614200 | -2.79160900 | 1.54306000  |
| C | 2.19696400  | -1.23272700 | 1.14642700  |
| H | 2.02690100  | -0.41520400 | 1.83973000  |
| C | 1.25632800  | 1.48738600  | -0.12399800 |
| C | 2.65237300  | -3.35467400 | -0.60871000 |
| H | 2.82161800  | -4.17784800 | -1.29445300 |
| C | 2.66395400  | 3.33792200  | 0.62739800  |
| H | 2.84046100  | 4.15427500  | 1.31922900  |
| C | -3.57323500 | 3.04861900  | 0.39535600  |
| C | 3.57781400  | -3.05949800 | 0.39405300  |
| C | -3.33407800 | -2.00620800 | -1.28874900 |
| H | -4.02988700 | -1.79256400 | -2.09266000 |
| C | -2.18087100 | 1.23431300  | 1.15729400  |
| H | -2.00258900 | 0.42523900  | 1.85859500  |
| C | 3.57795500  | 3.05337000  | -0.38872800 |
| C | -3.33653500 | 2.00605800  | 1.29256400  |
| H | -4.03810600 | 1.79190300  | 2.09139500  |

|   |             |             |             |
|---|-------------|-------------|-------------|
| C | 2.18977500  | 1.23272800  | -1.14288700 |
| H | 2.01304500  | 0.42083400  | -1.84125200 |
| C | -2.17707600 | -1.23746200 | -1.14820100 |
| H | -1.99170900 | -0.43116000 | -1.85080000 |
| C | -2.65803600 | 3.33307800  | -0.61982300 |
| H | -2.83627400 | 4.14645100  | -1.31471600 |
| C | 3.34367100  | 2.00656300  | -1.28177500 |
| H | 4.04569700  | 1.79163000  | -2.08017500 |
| C | -1.24775400 | 1.48695400  | 0.13774400  |
| C | -3.57927000 | -3.04562200 | -0.39026400 |
| C | 1.25375900  | -1.49535500 | 0.13848500  |
| C | 0.00451600  | 0.68081400  | 0.00791000  |
| I | 5.34801100  | -4.23907800 | 0.57908100  |
| I | 5.33967300  | 4.24327500  | -0.58895700 |
| I | -5.34516200 | 4.22517700  | 0.58217100  |
| I | -5.34903200 | -4.22326800 | -0.59060800 |

## 7. References

(1) M. J. Frisch, G. W. Trucks, H. B. Schlegel, G. E. Scuseria, M. A. Robb, J. R. Cheeseman, G. Scalmani, V. Barone, B. Mennucci, G. A. Petersson, H. Nakatsuji, M. Caricato, X. Li, H. P. Hratchian, A. F. Izmaylov, J. Bloino, G. Zheng, J. L. Sonnenberg, M. Hada, M. Ehara, K. Toyota, R. Fukuda, J. Hasegawa, M. Ishida, T. Nakajima, Y. Honda, O. Kitao, H. Nakai, T. Vreven, J. A. Jr. Montgomery, J. E. Peralta, F. Ogliaro, M. Bearpark, J. J. Heyd, E. Borthers, K. N. Kudin, V. N. Staroverov, R. Kobayashi, J. Normand, K. Rahavachari, A. Rendell, J. C. Burant, S. S. Iyengar, J. Tomasi, M. Cossi, N. Rega, J. M. Millam, M. Klene, J. E. Knox, J. B. Cross, V. Bakken, C. Adamo, Jaramillo, R. Gomperts, R. E. Stratmann, O. Yazyev, A. J. Austin, R. Cammi, C. Pomelli, J. W. Ochterski, R. L. Martin, K. Morokuma, V. G. Zakrzewski, G. A. Voth, P. Salvador, J. J. Dannenberg, S. Dapprich, A. D. Daniels, O. Farkas, J. B. Foresman, J. V. Ortiz, J. Cioslowski and D. J. Fox, Gaussian, Inc. Wallingford CT, 2009.

(2) A. D. Becke, *J. Chem. Phys.* 1993, **98**, 5648–5652.

(3) F. J. A. Ferrer, J. Cerezo, E. Stendardo, R. Improta, F. Santoro, *J. Chem. Theory Comput.* 2013, **9**, 2072–2082.

(4) C. Adamo, D. Jacquemin, *Chem. Soc. Rev.* 2013, **42**, 845–856.
